# Supplementary material for: Epigenetic clock analysis of diet, exercise, education, and lifestyle factors
Source: PubMed Central journal article supplement (PMC5361673; doi:10.18632/aging.101168), 2017-02-14
Supplement: aging-09-419-s001.pdf [file aging-09-419-s001.pdf]

## SUPPLEMENTARY INFORMATION

### Selection of participants from the Women's Health Initiative BA23 dataset

Participants included individuals from the Women's Health Initiative (WHI), a national study that began in 1993 and enrolled postmenopausal women between the ages of 50-79 years into either randomized clinical trials (RCTs) or into an observational study; in our sample, 1,657 of these individuals were enrolled in at least one of the RCTs and the remaining 441 were enrolled in the observational study. For this analysis, women were selected from one of two large WHI sub-cohorts that had previously undergone genotyping as well as profiling for cardiovascular disease related blood biomarkers through two core WHI ancillary studies (Supplementary Figure 10).

The first cohort is known as the WHI SNP Health Association Resource (SHARe) cohort of minorities that includes >8000 African American women and >3500 Hispanic women. These women were genotyped through the WHI core study M5-SHARe ([www.whi.org/researchers/data/WHIStudies/StudySites/M5](http://www.whi.org/researchers/data/WHIStudies/StudySites/M5)) and underwent baseline blood biomarker profiling through WHI Core study W54-SHARe ([www.whi.org/researchers/data/WHIStudies/StudySites/M5](http://www.whi.org/researchers/data/WHIStudies/StudySites/M5)). The second cohort consists of a combination of European Americans from the two Hormonal Therapy (HT) trials selected for GWAS and biomarkers in core studies W58 ([www.whi.org/researchers/data/WHIStudies/StudySites/W58](http://www.whi.org/researchers/data/WHIStudies/StudySites/W58)) and W63 ([www.whi.org/researchers/data/HIStudies/StudySites/W63](http://www.whi.org/researchers/data/HIStudies/StudySites/W63)).

While none of the participants of our study suffered from coronary heart disease at baseline, roughly half of the samples developed CHD at a later point. From the M5-SHARe and W54-SHARe cohorts, two sample sets were formed. The first (sample set 1) is a sample set of 637 CHD cases and 631 non-CHD cases as of Sept 30, 2010. The second sample set (sample set 2) is a non-overlapping sample of 432 cases of coronary heart disease and 472 non-cases as of September 17, 2012. We acknowledge a potential for selection bias using the above-described sampling scheme in WHI but suspect if such bias is present it is minimal. First, some selection bias is introduced by restricting our methylation profiling at baseline to women with GWAS & biomarker data from baseline as well, given the requirement that these participants must have signed the WHI supplemental consent for broad sharing of genetic data in 2005. However, we believe that selection bias at this stage is minimized by the inclusion of participants who died between the time of the start of the WHI study

and the time of supplemental consent in 2005, which resulted in the exclusion of only ~6-8% of all WHI participants. Nevertheless, participants unable or unwilling to sign consent in 2005 may not represent a random subset of all participants who survived to 2005. Second, some selection bias may also occur if similar gross differences exist in the characteristics of participants who consented to be followed in the two WHI extension studies beginning in 2005 and 2010 compared to non-participants at each stage. We believe these selection biases, if present, have minimal influence on our effect estimates.

**A**

|                          |                          | WHI BA23 dataset       |       |               |           |           |      |               |           |                  |       |               |           |          |       |               |           |       |      |        |       |       |       |       |      |
|--------------------------|--------------------------|------------------------|-------|---------------|-----------|-----------|------|---------------|-----------|------------------|-------|---------------|-----------|----------|-------|---------------|-----------|-------|------|--------|-------|-------|-------|-------|------|
|                          |                          | Adjusted for ethnicity |       |               |           | Caucasian |      |               |           | African American |       |               |           | Hispanic |       |               |           |       |      |        |       |       |       |       |      |
|                          |                          | n                      | μ     | EAAA<br>bicor | IEAA<br>p | n         | μ    | EAAA<br>bicor | IEAA<br>p | n                | μ     | EAAA<br>bicor | IEAA<br>p | n        | μ     | EAAA<br>bicor | IEAA<br>p |       |      |        |       |       |       |       |      |
| Diet                     | log2(Total energy)       | 2086                   | 10.51 | -0.02         | 0.33      | 0.00      | 0.87 | 992           | 10.58     | -0.04            | 0.17  | 0.00          | 0.90      | 666      | 10.46 | 0.03          | 0.40      | -0.01 | 0.85 | 428    | 10.45 | -0.06 | 0.20  | 0.01  | 0.90 |
|                          | Carbohydrate             | 2086                   | 49.40 | -0.01         | 0.59      | 0.04      | 0.05 | 992           | 49.45     | 0.01             | 0.81  | 0.05          | 0.11      | 666      | 49.03 | -0.03         | 0.47      | 0.02  | 0.55 | 428    | 49.89 | -0.02 | 0.61  | 0.06  | 0.19 |
|                          | Protein                  | 2086                   | 16.54 | -0.02         | 0.31      | -0.03     | 0.24 | 992           | 16.89     | -0.02            | 0.48  | 0.01          | 0.71      | 666      | 16.10 | -0.02         | 0.70      | -0.08 | 0.03 | 428    | 16.40 | -0.02 | 0.65  | -0.01 | 0.87 |
|                          | Fat                      | 2086                   | 34.20 | 0.03          | 0.20      | -0.02     | 0.45 | 992           | 33.23     | 0.01             | 0.71  | -0.02         | 0.52      | 666      | 35.65 | 0.02          | 0.66      | 0.00  | 0.96 | 428    | 34.18 | 0.09  | 0.07  | -0.05 | 0.35 |
|                          | log2(1+Red meat)         | 2086                   | 0.74  | 0.02          | 0.41      | 0.00      | 0.95 | 992           | 0.75      | -0.02            | 0.51  | -0.01         | 0.70      | 666      | 0.73  | 0.07          | 0.06      | 0.00  | 0.94 | 428    | 0.72  | 0.01  | 0.87  | 0.02  | 0.67 |
|                          | log2(1+Poultry)          | 2086                   | 0.46  | -0.04         | 0.06      | -0.05     | 0.02 | 992           | 0.41      | -0.05            | 0.15  | -0.05         | 0.09      | 666      | 0.52  | -0.02         | 0.69      | -0.08 | 0.04 | 428    | 0.47  | -0.07 | 0.17  | 0.01  | 0.89 |
|                          | log2(1+Fish)             | 2086                   | 0.31  | -0.08         | 6E-4      | -0.02     | 0.34 | 992           | 0.29      | -0.07            | 0.04  | -0.02         | 0.52      | 666      | 0.37  | -0.06         | 0.11      | -0.09 | 0.03 | 428    | 0.25  | -0.11 | 0.02  | 0.00  | 0.94 |
|                          | log2(1+Dairy)            | 2086                   | 1.25  | -0.02         | 0.26      | -0.02     | 0.43 | 992           | 1.42      | -0.03            | 0.30  | -0.01         | 0.72      | 666      | 1.02  | 0.01          | 0.84      | -0.02 | 0.53 | 428    | 1.23  | -0.06 | 0.24  | -0.02 | 0.63 |
|                          | log2(1+Whole grains)     | 2086                   | 1.03  | -0.01         | 0.58      | 0.01      | 0.76 | 992           | 1.00      | -0.04            | 0.16  | 0.00          | 0.97      | 666      | 1.03  | 0.04          | 0.36      | 0.00  | 0.97 | 428    | 1.07  | -0.02 | 0.63  | 0.03  | 0.52 |
|                          | log2(1+Nuts)             | 2086                   | 0.18  | 0.01          | 0.58      | 0.03      | 0.13 | 992           | 0.20      | 0.03             | 0.31  | 0.05          | 0.09      | 666      | 0.20  | 0.01          | 0.88      | 0.02  | 0.58 | 428    | 0.11  | 0.02  | 0.71  | 0.05  | 0.27 |
| log2(Fruits)             | 2086                     | 0.33                   | -0.03 | 0.20          | 0.02      | 0.40      | 992  | 0.47          | -0.04     | 0.19             | 0.02  | 0.63          | 666       | 0.28     | 0.02  | 0.57          | 0.02      | 0.64  | 428  | 0.11   | -0.07 | 0.12  | 0.02  | 0.65  |      |
| log2(Vegetables)         | 2086                     | 0.60                   | -0.05 | 0.03          | 0.02      | 0.34      | 992  | 0.93          | -0.06     | 0.08             | 0.02  | 0.59          | 666       | 0.44     | 0.01  | 0.85          | 0.01      | 0.89  | 428  | 0.10   | -0.12 | 0.02  | 0.04  | 0.37  |      |
| Blood nutrients          | Retinol                  | 224                    | 0.59  | -0.09         | 0.18      | 0.00      | 0.99 | 74            | 0.65      | 0.05             | 0.70  | 0.21          | 0.08      | 85       | 0.57  | -0.13         | 0.24      | -0.10 | 0.38 | 65     | 0.56  | -0.18 | 0.15  | -0.15 | 0.24 |
|                          | Mean carotenoids         | 224                    | 0.03  | -0.19         | 4E-3      | -0.03     | 0.63 | 74            | 0.08      | -0.21            | 0.07  | -0.07         | 0.55      | 85       | -0.02 | -0.13         | 0.22      | -0.04 | 0.75 | 65     | 0.03  | -0.25 | 0.01  | -0.01 | 0.95 |
|                          | Lycopene                 | 224                    | 0.42  | -0.12         | 0.07      | -0.03     | 0.66 | 74            | 0.45      | -0.11            | 0.36  | 0.07          | 0.56      | 85       | 0.37  | -0.15         | 0.18      | -0.09 | 0.40 | 65     | 0.44  | -0.17 | 0.17  | -0.09 | 0.49 |
|                          | log2(alpha-Carotene)     | 224                    | -4.28 | -0.16         | 0.02      | 0.01      | 0.88 | 74            | -4.07     | -0.14            | 0.24  | -0.04         | 0.74      | 85       | -4.60 | -0.11         | 0.31      | -0.02 | 0.85 | 65     | -4.11 | -0.22 | 0.07  | 0.05  | 0.70 |
|                          | log2(beta-Carotene)      | 224                    | -2.09 | -0.19         | 4E-3      | -0.08     | 0.26 | 74            | -1.94     | -0.13            | 0.28  | -0.03         | 0.77      | 85       | -2.02 | -0.16         | 0.14      | -0.08 | 0.45 | 65     | -2.35 | -0.27 | 0.03  | -0.11 | 0.38 |
|                          | log2(Lutein+Zeaxanthin)  | 224                    | -2.36 | -0.13         | 0.06      | -0.06     | 0.38 | 74            | -2.44     | -0.08            | 0.52  | -0.05         | 0.70      | 85       | -2.22 | -0.13         | 0.23      | -0.16 | 0.15 | 65     | -2.45 | -0.17 | 0.17  | 0.08  | 0.54 |
|                          | log2(beta-Cryptoxanthin) | 224                    | -3.82 | -0.04         | 0.52      | 0.03      | 0.67 | 74            | -3.94     | -0.15            | 0.19  | -0.01         | 0.96      | 85       | -3.82 | -0.09         | 0.43      | -0.08 | 0.48 | 65     | -3.66 | -0.06 | 0.66  | 0.02  | 0.88 |
|                          | log2(alpha-Tocopherol)   | 224                    | 3.90  | -0.04         | 0.54      | 0.00      | 1.00 | 74            | 4.03      | -0.10            | 0.40  | 0.03          | 0.78      | 85       | 3.81  | 0.04          | 0.75      | -0.12 | 0.27 | 65     | 3.86  | -0.05 | 0.69  | 0.13  | 0.30 |
|                          | log2(gamma-Tocopherol)   | 224                    | 0.87  | 0.05          | 0.48      | 0.12      | 0.07 | 74            | 0.87      | 0.00             | 0.98  | 0.07          | 0.54      | 85       | 0.96  | 0.15          | 0.17      | -0.19 | 0.08 | 65     | 0.74  | -0.01 | 0.93  | 0.08  | 0.55 |
|                          | log2(C-reactive protein) | 2073                   | 1.58  | 0.11          | 3E-7      | 0.07      | 2E-3 | 991           | 1.26      | 0.12             | 3E-4  | 0.07          | 0.04      | 661      | 1.90  | 0.07          | 0.06      | 0.08  | 0.03 | 421    | 1.81  | 0.19  | 1E-4  | 0.05  | 0.33 |
| log2(Insulin)            | 2051                     | 5.82                   | 0.09  | 3E-5          | 0.06      | 3E-3      | 970  | 5.65          | 0.12      | 2E-4             | 0.06  | 0.05          | 656       | 6.05     | 0.06  | 0.13          | 0.09      | 0.02  | 425  | 5.86   | 0.09  | 0.06  | 0.02  | 0.65  |      |
| log2(Glucose)            | 2091                     | 6.70                   | 0.04  | 0.08          | 0.06      | 0.01      | 995  | 6.67          | 0.07      | 0.02             | 0.05  | 0.15          | 666       | 6.74     | 0.02  | 0.62          | 0.07      | 0.07  | 430  | 6.70   | 0.00  | 0.93  | 0.07  | 0.17  |      |
| log2(Triglyceride)       | 2091                     | 7.02                   | 0.09  | 2E-5          | 0.08      | 2E-4      | 995  | 7.12          | 0.10      | 3E-3             | 0.08  | 0.02          | 666       | 6.76     | 0.08  | 0.04          | 0.09      | 0.02  | 430  | 7.21   | 0.11  | 0.02  | 0.08  | 0.09  |      |
| Total cholesterol        | 2091                     | 233.03                 | 0.04  | 0.06          | 0.03      | 0.16      | 995  | 236.31        | 0.08      | 0.01             | 0.04  | 0.24          | 666       | 231.75   | 0.02  | 0.66          | 0.01      | 0.79  | 430  | 227.37 | 0.00  | 0.98  | 0.04  | 0.37  |      |
| LDL cholesterol          | 2057                     | 151.23                 | 0.03  | 0.18          | 0.01      | 0.58      | 976  | 153.81        | 0.07      | 0.02             | 0.02  | 0.54          | 659       | 152.79   | 0.01  | 0.82          | 0.00      | 0.92  | 422  | 142.83 | -0.03 | 0.50  | 0.02  | 0.74  |      |
| HDL cholesterol          | 2091                     | 52.17                  | -0.06 | 4E-3          | -0.04     | 0.09      | 995  | 51.01         | -0.06     | 0.05             | -0.06 | 0.06          | 666       | 54.71    | -0.06 | 0.14          | -0.02     | 0.62  | 430  | 50.91  | -0.07 | 0.14  | -0.02 | 0.64  |      |
| log2(Creatinine)         | 2041                     | -0.42                  | 0.01  | 0.59          | -0.01     | 0.67      | 973  | -0.45         | 0.03      | 0.43             | -0.02 | 0.62          | 657       | -0.33    | 0.05  | 0.19          | 0.03      | 0.40  | 411  | -0.50  | -0.07 | 0.14  | -0.07 | 0.19  |      |
| Systolic blood pressure  | 2093                     | 132.02                 | 0.05  | 0.01          | 0.02      | 0.26      | 995  | 131.92        | 0.10      | 2E-3             | 0.01  | 0.85          | 668       | 134.05   | 0.03  | 0.37          | 0.07      | 0.08  | 430  | 129.06 | -0.02 | 0.63  | -0.01 | 0.88  |      |
| Diastolic blood pressure | 2093                     | 76.41                  | 0.03  | 0.24          | 0.03      | 0.13      | 995  | 75.21         | 0.06      | 0.05             | 0.02  | 0.49          | 668       | 78.71    | 0.00  | 0.98          | 0.08      | 0.05  | 430  | 75.58  | -0.03 | 0.59  | -0.01 | 0.78  |      |
| log2(Waist / hip ratio)  | 2093                     | -0.27                  | 0.09  | 8E-5          | 0.04      | 0.10      | 995  | -0.28         | 0.09      | 0.01             | 0.06  | 0.06          | 668       | -0.27    | 0.06  | 0.13          | -0.01     | 0.77  | 430  | -0.28  | 0.13  | 0.01  | 0.06  | 0.23  |      |
| BMI                      | 2093                     | 29.85                  | 0.08  | 6E-4          | 0.07      | 2E-3      | 995  | 28.83         | 0.10      | 1E-3             | 0.10  | 2E-3          | 668       | 31.71    | 0.05  | 0.20          | 0.06      | 0.13  | 430  | 29.32  | 0.06  | 0.20  | 0.01  | 0.81  |      |
| Socio-behavioral         | Education                | 2071                   | 6.66  | -0.10         | 2E-6      | 0.00      | 0.83 | 989           | 6.86      | -0.12            | 2E-4  | 0.02          | 0.43      | 660      | 6.85  | -0.11         | 0.01      | -0.03 | 0.40 | 422    | 5.90  | -0.06 | 0.20  | 0.02  | 0.61 |
|                          | Income                   | 2019                   | 3.54  | -0.08         | 3E-4      | -0.01     | 0.51 | 964           | 3.67      | -0.06            | 0.06  | 0.02          | 0.64      | 642      | 3.47  | -0.08         | 0.04      | -0.06 | 0.11 | 413    | 3.32  | -0.11 | 0.02  | 0.01  | 0.80 |
|                          | log2(1+Exercise)         | 2090                   | 2.49  | -0.08         | 5E-4      | -0.03     | 0.20 | 994           | 2.67      | -0.08            | 0.01  | 0.01          | 0.70      | 667      | 2.30  | -0.04         | 0.26      | -0.11 | 4E-3 | 429    | 2.37  | -0.12 | 0.01  | 0.02  | 0.67 |
|                          | Current smoker           | 2090                   | 0.14  | 0.00          | 0.93      | 0.00      | 0.88 | 994           | 0.13      | -0.03            | 0.37  | 0.01          | 0.80      | 667      | 0.16  | 0.07          | 0.07      | 0.02  | 0.60 | 429    | 0.14  | -0.01 | 0.77  | 0.05  | 0.27 |
|                          | log2(1+Alcohol)          | 2086                   | 1.09  | -0.05         | 0.02      | -0.01     | 0.52 | 992           | 1.44      | -0.06            | 0.07  | -0.02         | 0.48      | 666      | 0.73  | -0.01         | 0.72      | 0.01  | 0.79 | 428    | 0.86  | 0.00  | 0.92  | 0.01  | 0.82 |

**B**

|      |                    | WHI AS315 dataset      |       |               |           |           |      |               |           |                  |      |               |           |          |       |               |           |       |      |     |       |       |      |       |      |
|------|--------------------|------------------------|-------|---------------|-----------|-----------|------|---------------|-----------|------------------|------|---------------|-----------|----------|-------|---------------|-----------|-------|------|-----|-------|-------|------|-------|------|
|      |                    | Adjusted for ethnicity |       |               |           | Caucasian |      |               |           | African American |      |               |           | Hispanic |       |               |           |       |      |     |       |       |      |       |      |
|      |                    | n                      | μ     | EAAA<br>bicor | IEAA<br>p | n         | μ    | EAAA<br>bicor | IEAA<br>p | n                | μ    | EAAA<br>bicor | IEAA<br>p | n        | μ     | EAAA<br>bicor | IEAA<br>p |       |      |     |       |       |      |       |      |
| Diet | log2(Total energy) | 1601                   | 10.56 | -0.02         | 0.49      | 0.01      | 0.77 | 828           | 10.62     | -0.03            | 0.37 | 0.05          | 0.13      | 405      | 10.49 | 0.04          | 0.45      | 0.03  | 0.52 | 205 | 10.58 | -0.03 | 0.71 | -0.14 | 0.05 |
|      | Carbohydrate       | 1601                   | 48.50 | 0.02          | 0.47      | -0.03     | 0.30 | 828           | 48.09     | 0.03             | 0.34 | -0.04         | 0.24      | 405      | 48.67 | 0.03          | 0.49      | 0.01  | 0.88 | 205 | 48.34 | -0.03 | 0.68 | 0.06  | 0.37 |
|      | Protein            | 1601                   | 16.45 | -0.03         | 0.27      | -0.02     | 0.36 | 828           | 16.73     | -0.06            | 0.07 | -0.04         | 0.21      | 405      | 15.87 | -0.05         | 0.29      | -0.01 | 0.82 | 205 | 16.43 | 0.08  | 0.25 | -0.01 | 0.87 |
|      | Fat                | 1601                   | 35.28 | 0.01          | 0.58      | 0.03      | 0.23 | 828           | 34.98     | 0.03             | 0.37 | 0.06          | 0.11      | 405      | 36.32 | -0.04         | 0.47      | -0.03 | 0.57 | 205 | 35.65 | 0.05  | 0.44 | -0.04 | 0.57 |
|      | log2(1+Red meat)   | 1601                   | 0.77  | 0.02          | 0.42      | 0.07      | 0.01 | 828           | 0.79      | 0.02             | 0.59 | 0.10          | 3E-3      | 405      | 0.76  | 0.03          | 0.54      | 0.09  | 0.06 | 205 | 0.82  | 0.05  | 0.46 | -0.09 | 0.20 |
|      | log2(1+Poultry)    | 1601                   | 0.45  | -0.02         | 0.43      | -0.04     | 0.10 | 828           | 0.43      | -0.05            | 0.19 | -0.02         | 0.59      | 405      | 0.50  | 0.03          | 0.54      | 0.00  | 0.94 | 205 | 0.49  | 0.01  | 0.90 | -0.16 | 0.02 |
|      | log2(1+Fish)       | 1601                   | 0.32  | -0.06         | 0.01      | -0.01     | 0.59 | 828           | 0.31      | -0.07            | 0.04 | 0.03          | 0.46      | 405      | 0.36  | -0.05         | 0.27      | -0.09 | 0.09 | 205 | 0.26  | -0.03 | 0.72 | -0.08 | 0.24 |
|      | log2(1+Dairy)      | 1601                   | 1.26  | -0.01         | 0.82      | 0.02      | 0.37 | 828           | 1.42      | -0.04            | 0.27 | 0.04          | 0.27      | 405      | 1.00  | 0.05          | 0.27      | 0.08  | 0.11 | 205 | 1.30  | 0.06  | 0.37 | -0.04 |      |

**Supplementary Table 1. Linear models of IEAA and EEAA in WHI metformin users with repeat measurements.**

|                                                  | IEAA                |          | EEAA                |          |
|--------------------------------------------------|---------------------|----------|---------------------|----------|
|                                                  | $\beta$ Coefficient | P-Value  | $\beta$ Coefficient | P-Value  |
| Started Metformin                                | -0.79               | 0.456    | -0.003              | 0.998    |
| IEAA/EEAA (First Blood Draw)                     | -0.33               | 2.88e-13 | -0.35               | 8.92e-15 |
| Age (First Blood Draw)                           | -0.55               | 1.73e-08 | -0.96               | 4.67e-15 |
| Age (Second Blood Draw)                          | 0.50                | 6.02e-07 | 0.98                | 1.21e-14 |
| Glucose (First Blood Draw)                       | 0.02                | 0.132    | 0.03                | 0.048    |
| Glucose (First Blood Draw)                       | 0.01                | 0.657    | -0.03               | 0.056    |
| Education                                        | 0.27                | 0.004    | -0.02               | 0.89     |
| Race/Ethnicity<br>(Reference=Non-Hispanic White) |                     |          |                     |          |
| American Indian                                  | -1.03               | 0.577    | -1.31               | 0.555    |
| Asian                                            | -1.10               | 0.450    | -3.54               | 0.044    |
| Non-Hispanic Black                               | -2.04               | 0.166    | -2.45               | 0.165    |
| Hispanic                                         | -0.63               | 0.658    | -2.88               | 0.093    |
| Other                                            | 1.32                | 0.614    | -3.60               | 0.254    |

Table shows the beta-coefficients and corresponding p-values for linear models of IEAA and EEAA in the middle and right columns, respectively. The left column denotes the regressors in the models.

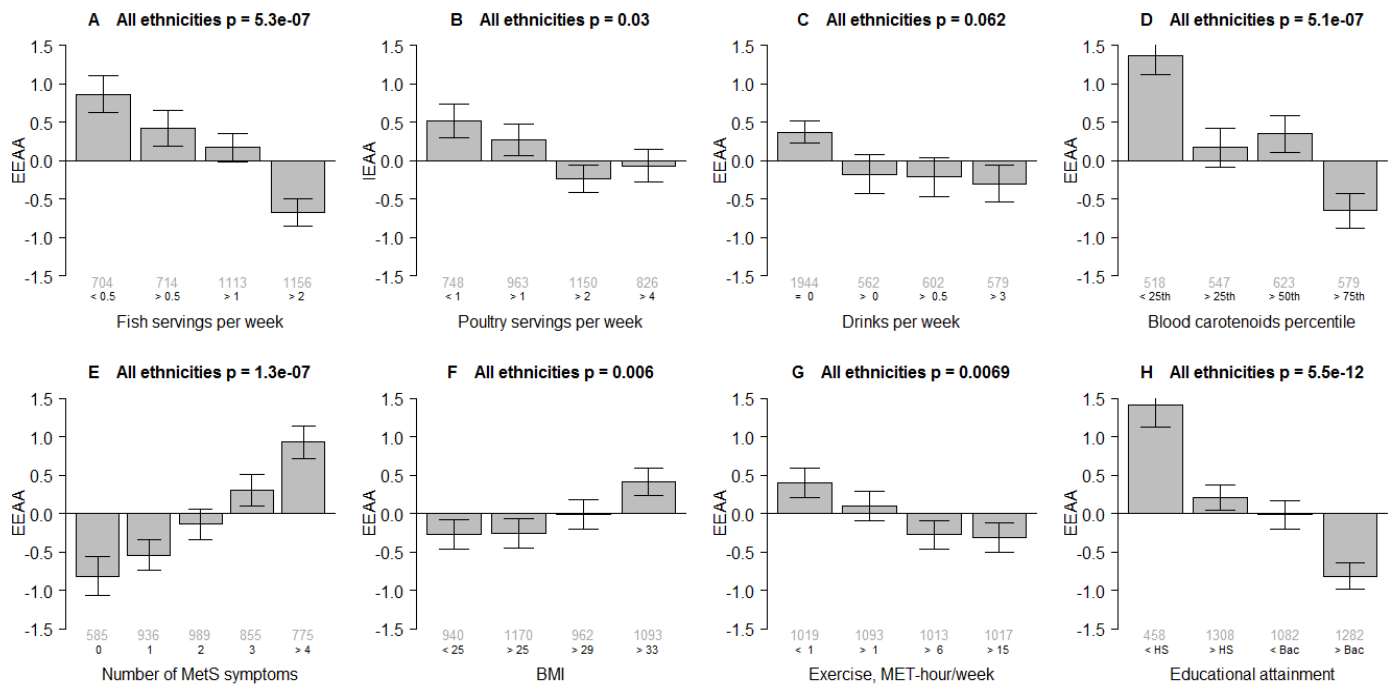

**Supplementary Figure 2. EEAA among different levels of select dietary & lifestyle habits and measurements in the WHI.** Panels A-H show bar plots visualizing the EEAA among stratified levels of fish, poultry (IEAA in this case), alcohol intake, blood carotenoid levels, number of metabolic syndrome symptoms, BMI, exercise, and education. Cut points roughly correspond roughly to quartiles except with number of MetS symptoms and alcohol intake which were selected for evenly-sized strata as much as possible. The sample sizes for each stratum are shown in grey beneath each bar. P-values for differences between strata are listed above each bar plot. Exercise is measured in units of metabolic equivalent hours per week and education uses high school diploma, some college, and bachelor's degree as cut points.



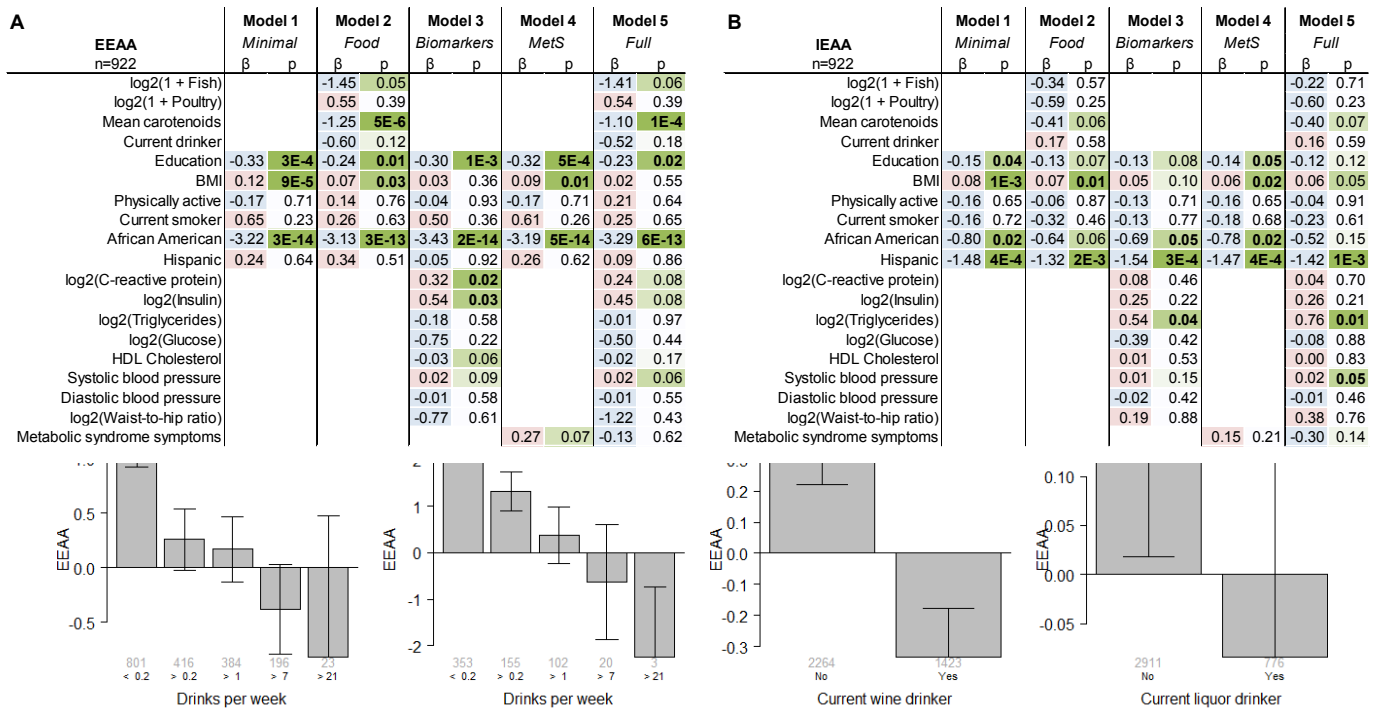

**Supplementary Figure 4. EEAA among different strata of ethnic groups, levels and types of alcohol intake in the WHI.** Panels A-D show bar plots visualizing the EEAA among stratified levels of alcohol intake (medium servings per week) for select ethnic groupings. Panels E-H show bar plots visualizing the EEAA among non- and current drinkers (at least one drink per month) of different types of alcoholic drinks: all types, beer, wine, and liquor. The sample sizes for each stratum are shown in grey beneath each bar. P-values for differences between strata are listed above each bar plot.

**A**

| EEAA<br>n         | WHI              |      |                |      |                 |      |              |      | Meta-analysis |        |
|-------------------|------------------|------|----------------|------|-----------------|------|--------------|------|---------------|--------|
|                   | Caucasian<br>886 |      | African<br>481 |      | Hispanic<br>259 |      | Asian<br>100 |      | meta-t        | meta-p |
|                   | $\beta$          | p    | $\beta$        | p    | $\beta$         | p    | $\beta$      | p    |               |        |
| log2(1 + Fish)    | -1.18            | 0.18 | -0.99          | 0.28 | -0.91           | 0.50 | -0.67        | 0.73 | -1.88         | 0.06   |
| log2(1 + Poultry) | 0.03             | 0.97 | -0.03          | 0.98 | 0.47            | 0.65 | 1.82         | 0.35 | 0.41          | 0.68   |
| Mean carotenoids  | -0.98            | 2E-3 | -0.93          | 0.02 | -0.68           | 0.17 | -1.25        | 0.16 | -4.34         | 1E-5   |
| Current drinker   | -0.80            | 0.04 | 0.17           | 0.77 | -0.95           | 0.18 | -2.36        | 0.04 | -2.31         | 0.02   |
| Education         | -0.05            | 0.62 | -0.17          | 0.22 | -0.47           | 2E-3 | 0.04         | 0.89 | -2.20         | 0.03   |
| BMI               | 0.03             | 0.43 | 0.14           | 2E-3 | 0.07            | 0.28 | 0.11         | 0.37 | 2.85          | 4E-3   |
| Physically active | -0.54            | 0.28 | 0.47           | 0.44 | 1.06            | 0.19 | -2.49        | 0.11 | -0.24         | 0.81   |
| Current smoker    | 1.15             | 0.06 | 0.75           | 0.35 | -2.29           | 0.02 | -0.82        | 0.76 | 0.87          | 0.38   |

**B**

| IEAA<br>n         | WHI              |      |                |      |                 |      |              |      | Meta-analysis |        |
|-------------------|------------------|------|----------------|------|-----------------|------|--------------|------|---------------|--------|
|                   | Caucasian<br>886 |      | African<br>481 |      | Hispanic<br>259 |      | Asian<br>100 |      | meta-t        | meta-p |
|                   | $\beta$          | p    | $\beta$        | p    | $\beta$         | p    | $\beta$      | p    |               |        |
| log2(1 + Fish)    | 0.20             | 0.78 | -0.90          | 0.24 | -0.21           | 0.85 | 1.05         | 0.52 | -0.35         | 0.73   |
| log2(1 + Poultry) | -0.50            | 0.43 | 0.13           | 0.85 | -0.84           | 0.30 | -2.23        | 0.18 | -1.20         | 0.23   |
| Mean carotenoids  | -0.62            | 0.02 | -0.43          | 0.20 | -0.14           | 0.71 | 0.24         | 0.75 | -2.47         | 0.01   |
| Current drinker   | -0.27            | 0.40 | 0.42           | 0.38 | -0.42           | 0.46 | 1.09         | 0.27 | -0.16         | 0.87   |
| Education         | -0.02            | 0.80 | -0.22          | 0.06 | -0.06           | 0.63 | -0.35        | 0.15 | -1.72         | 0.09   |
| BMI               | 0.04             | 0.22 | 0.05           | 0.19 | 0.04            | 0.41 | 0.36         | 8E-4 | 2.72          | 0.01   |
| Physically active | -0.10            | 0.82 | 0.05           | 0.92 | 0.91            | 0.16 | -2.26        | 0.09 | 0.02          | 0.95   |
| Current smoker    | -0.17            | 0.74 | -0.70          | 0.30 | -0.55           | 0.48 | 0.13         | 0.96 | -1.05         | 0.25   |

**Supplementary Figure 5. Related to Figure 2. Meta-analysis of multivariable linear models of EEAA and IEAA including carotenoid levels in the WHI.** Analogous to Figure 2 except including mean carotenoid levels: EEAA (panel A) and IEAA (panel B) were regressed on potential confounding factors, fish and poultry intake, mean across standardized measures of carotenoids, and current drinker status for the ethnic strata with sufficient sample sizes (n>100). Individual columns correspond to coefficient estimates ( $\beta$ ) colored blue or red for negative and positive values respectively, and p-values (p) colored in green according to magnitude of significance, with the exception of the last two columns which denote Stouffer's method meta-t and meta-p values. Models are adjusted for originating dataset (WHI BA23 or WHI AS315).

| A | EEAA<br>n=922               | Model 1 |       | Model 2 |       | Model 3    |       | Model 4 |       | Model 5 |       |
|---|-----------------------------|---------|-------|---------|-------|------------|-------|---------|-------|---------|-------|
|   |                             | Minimal |       | Food    |       | Biomarkers |       | MetS    |       | Full    |       |
|   |                             | $\beta$ | p     | $\beta$ | p     | $\beta$    | p     | $\beta$ | p     | $\beta$ | p     |
|   | log2(1 + Fish)              |         |       | -1.45   | 0.05  |            |       |         |       | -1.41   | 0.06  |
|   | log2(1 + Poultry)           |         |       | 0.55    | 0.39  |            |       |         |       | 0.54    | 0.39  |
|   | Mean carotenoids            |         |       | -1.25   | 5E-6  |            |       |         |       | -1.10   | 1E-4  |
|   | Current drinker             |         |       | -0.60   | 0.12  |            |       |         |       | -0.52   | 0.18  |
|   | Education                   | -0.33   | 3E-4  | -0.24   | 0.01  | -0.30      | 1E-3  | -0.32   | 5E-4  | -0.23   | 0.02  |
|   | BMI                         | 0.12    | 9E-5  | 0.07    | 0.03  | 0.03       | 0.36  | 0.09    | 0.01  | 0.02    | 0.55  |
|   | Physically active           | -0.17   | 0.71  | 0.14    | 0.76  | -0.04      | 0.93  | -0.17   | 0.71  | 0.21    | 0.64  |
|   | Current smoker              | 0.65    | 0.23  | 0.26    | 0.63  | 0.50       | 0.36  | 0.61    | 0.26  | 0.25    | 0.65  |
|   | African American            | -3.22   | 3E-14 | -3.13   | 3E-13 | -3.43      | 2E-14 | -3.19   | 5E-14 | -3.29   | 6E-13 |
|   | Hispanic                    | 0.24    | 0.64  | 0.34    | 0.51  | -0.05      | 0.92  | 0.26    | 0.62  | 0.09    | 0.86  |
|   | log2(C-reactive protein)    |         |       |         |       | 0.32       | 0.02  |         |       | 0.24    | 0.08  |
|   | log2(Insulin)               |         |       |         |       | 0.54       | 0.03  |         |       | 0.45    | 0.08  |
|   | log2(Triglycerides)         |         |       |         |       | -0.18      | 0.58  |         |       | -0.01   | 0.97  |
|   | log2(Glucose)               |         |       |         |       | -0.75      | 0.22  |         |       | -0.50   | 0.44  |
|   | HDL Cholesterol             |         |       |         |       | -0.03      | 0.06  |         |       | -0.02   | 0.17  |
|   | Systolic blood pressure     |         |       |         |       | 0.02       | 0.09  |         |       | 0.02    | 0.06  |
|   | Diastolic blood pressure    |         |       |         |       | -0.01      | 0.58  |         |       | -0.01   | 0.55  |
|   | log2(Waist-to-hip ratio)    |         |       |         |       | -0.77      | 0.61  |         |       | -1.22   | 0.43  |
|   | Metabolic syndrome symptoms |         |       |         |       |            |       | 0.27    | 0.07  | -0.13   | 0.62  |

  

| B | IEAA<br>n=922               | Model 1 |      | Model 2 |      | Model 3    |      | Model 4 |      | Model 5 |      |
|---|-----------------------------|---------|------|---------|------|------------|------|---------|------|---------|------|
|   |                             | Minimal |      | Food    |      | Biomarkers |      | MetS    |      | Full    |      |
|   |                             | $\beta$ | p    | $\beta$ | p    | $\beta$    | p    | $\beta$ | p    | $\beta$ | p    |
|   | log2(1 + Fish)              |         |      | -0.34   | 0.57 |            |      |         |      | -0.22   | 0.71 |
|   | log2(1 + Poultry)           |         |      | -0.59   | 0.25 |            |      |         |      | -0.60   | 0.23 |
|   | Mean carotenoids            |         |      | -0.41   | 0.06 |            |      |         |      | -0.40   | 0.07 |
|   | Current drinker             |         |      | 0.17    | 0.58 |            |      |         |      | 0.16    | 0.59 |
|   | Education                   | -0.15   | 0.04 | -0.13   | 0.07 | -0.13      | 0.08 | -0.14   | 0.05 | -0.12   | 0.12 |
|   | BMI                         | 0.08    | 1E-3 | 0.07    | 0.01 | 0.05       | 0.10 | 0.06    | 0.02 | 0.06    | 0.05 |
|   | Physically active           | -0.16   | 0.65 | -0.06   | 0.87 | -0.13      | 0.71 | -0.16   | 0.65 | -0.04   | 0.91 |
|   | Current smoker              | -0.16   | 0.72 | -0.32   | 0.46 | -0.13      | 0.77 | -0.18   | 0.68 | -0.23   | 0.61 |
|   | African American            | -0.80   | 0.02 | -0.64   | 0.06 | -0.69      | 0.05 | -0.78   | 0.02 | -0.52   | 0.15 |
|   | Hispanic                    | -1.48   | 4E-4 | -1.32   | 2E-3 | -1.54      | 3E-4 | -1.47   | 4E-4 | -1.42   | 1E-3 |
|   | log2(C-reactive protein)    |         |      |         |      | 0.08       | 0.46 |         |      | 0.04    | 0.70 |
|   | log2(Insulin)               |         |      |         |      | 0.25       | 0.22 |         |      | 0.26    | 0.21 |
|   | log2(Triglycerides)         |         |      |         |      | 0.54       | 0.04 |         |      | 0.76    | 0.01 |
|   | log2(Glucose)               |         |      |         |      | -0.39      | 0.42 |         |      | -0.08   | 0.88 |
|   | HDL Cholesterol             |         |      |         |      | 0.01       | 0.53 |         |      | 0.00    | 0.83 |
|   | Systolic blood pressure     |         |      |         |      | 0.01       | 0.15 |         |      | 0.02    | 0.05 |
|   | Diastolic blood pressure    |         |      |         |      | -0.02      | 0.42 |         |      | -0.01   | 0.46 |
|   | log2(Waist-to-hip ratio)    |         |      |         |      | 0.19       | 0.88 |         |      | 0.38    | 0.76 |
|   | Metabolic syndrome symptoms |         |      |         |      |            |      | 0.15    | 0.21 | -0.30   | 0.14 |

**Supplementary Figure 6. Related to Figure 3. Multivariate linear models of EEAA and IEAA including carotenoid levels and with and without biomarkers in the WHI.** Analogous to Figure 3 except including mean carotenoid levels: EEAA (panel A) and IEAA (panel B) were regressed on potential confounding factors, fish and poultry intake and current drinker status, and select biomarkers. Individual columns list the corresponding coefficient estimates ( $\beta$ ) and p-values (p) for each fitting. Coefficients are colored according to sign (positive = red, negative = blue) and significance according to magnitude (green). Models 1 through 5 correspond to a minimal model, a model including dietary intake variables, a model including potential explanatory biomarkers, a model including number of metabolic syndrome symptoms and a complete model with all of the variables above, respectively. Models are adjusted for originating dataset (BA23 or AS315).

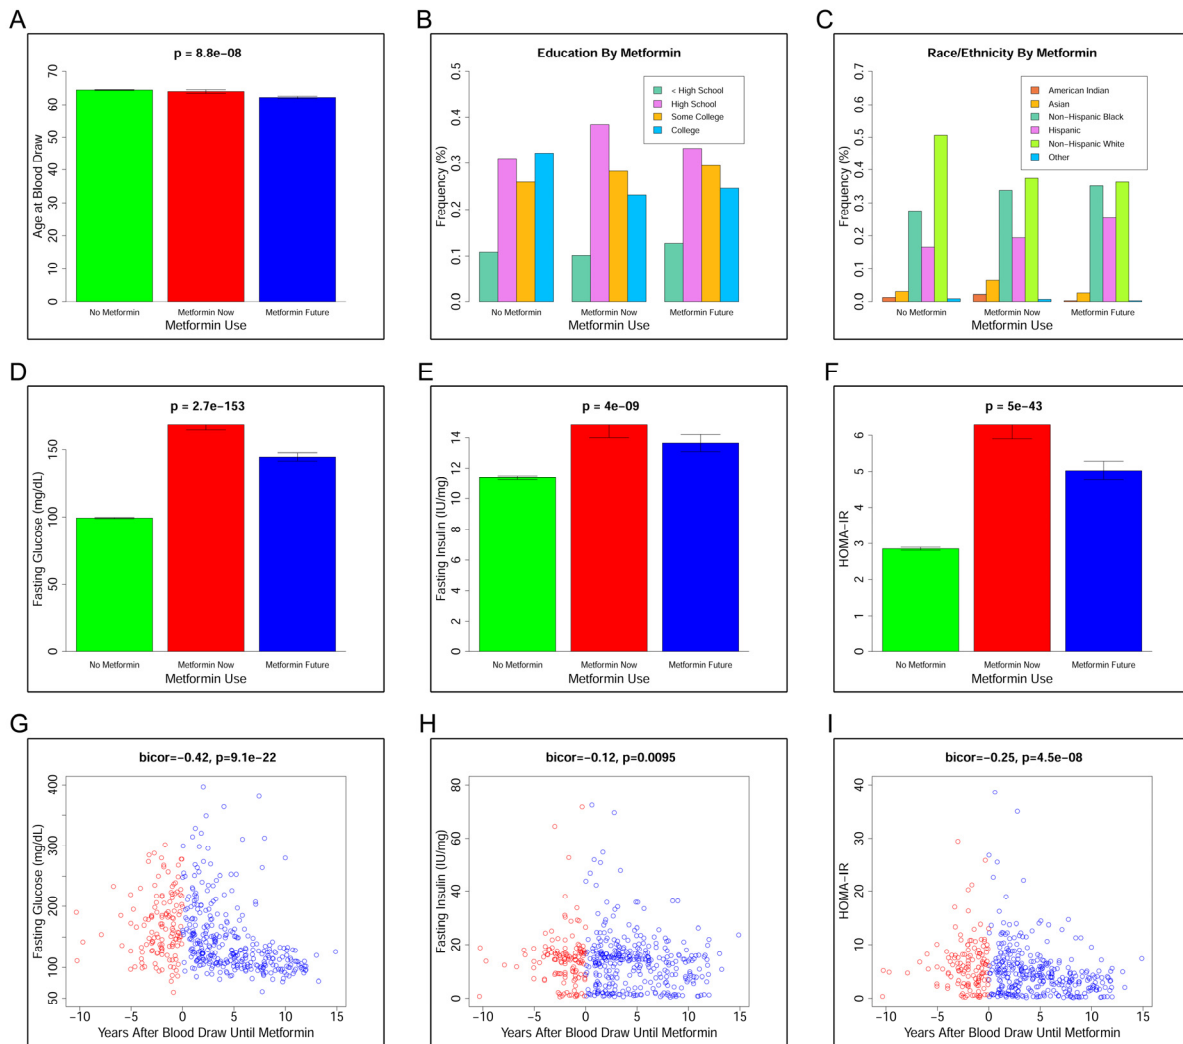

**Supplementary Figure 7. Characteristics of non-, current, and future metformin users in the WHI.** Panels A-F show barplots comparing the age at blood draw, educational attainment, ethnicity, fasting glucose, insulin, and insulin resistance of non-, current, and future metformin users (colored in green, red, and blue). Panels G-I show plotting fasting glucose, insulin, and insulin resistance as a function of years after blood draw until metformin with current and future users colored in red and blue respectively.

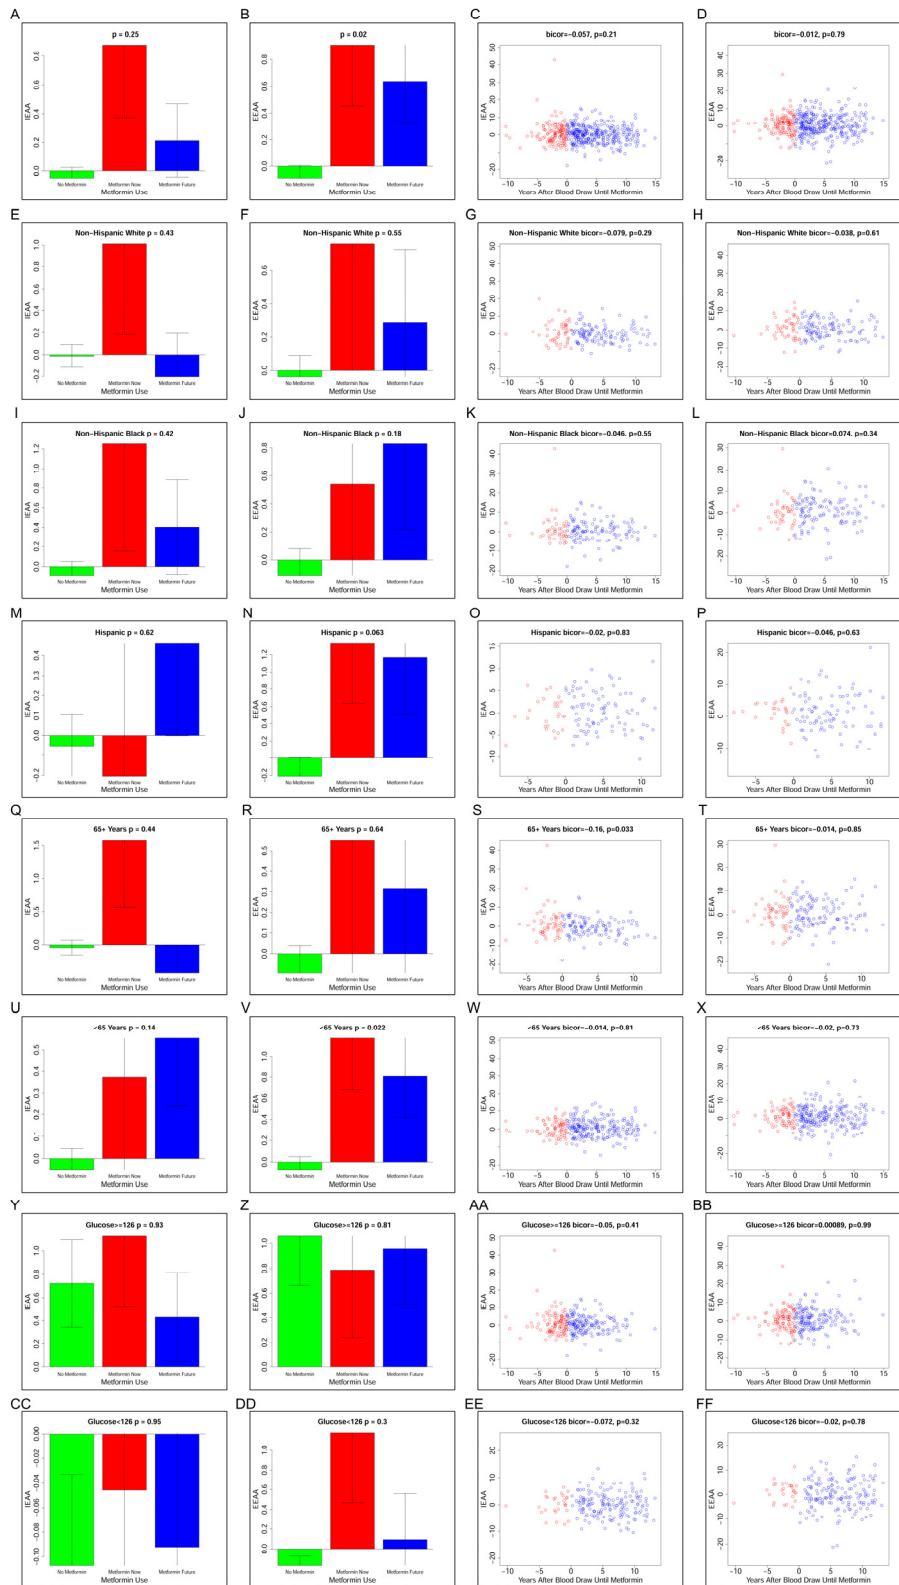

**Supplementary Figure 8. IEAA and EAA among non-, current, and future users of metformin in the WHI.** Columns 1 and 2 show barplots with IEAA and EAA on the y-axis and no metformin, current metformin, and later metformin usage strata (green, red, and blue respectively). Columns 3 and 4 show scatterplots with IEAA and EAA plotted as a function of years after blood draw until metformin usage with current and future metformin users colored in red and blue respectively. Rows show the same plots for different sociodemographic strata: all available WHI participants, non-hispanic white, non-hispanic black, hispanic, > 65 years old, < 65 years old, hyperglycemic, and non-hyperglycemic groups. P-values (and correlation coefficients) are shown and the top of each plot.

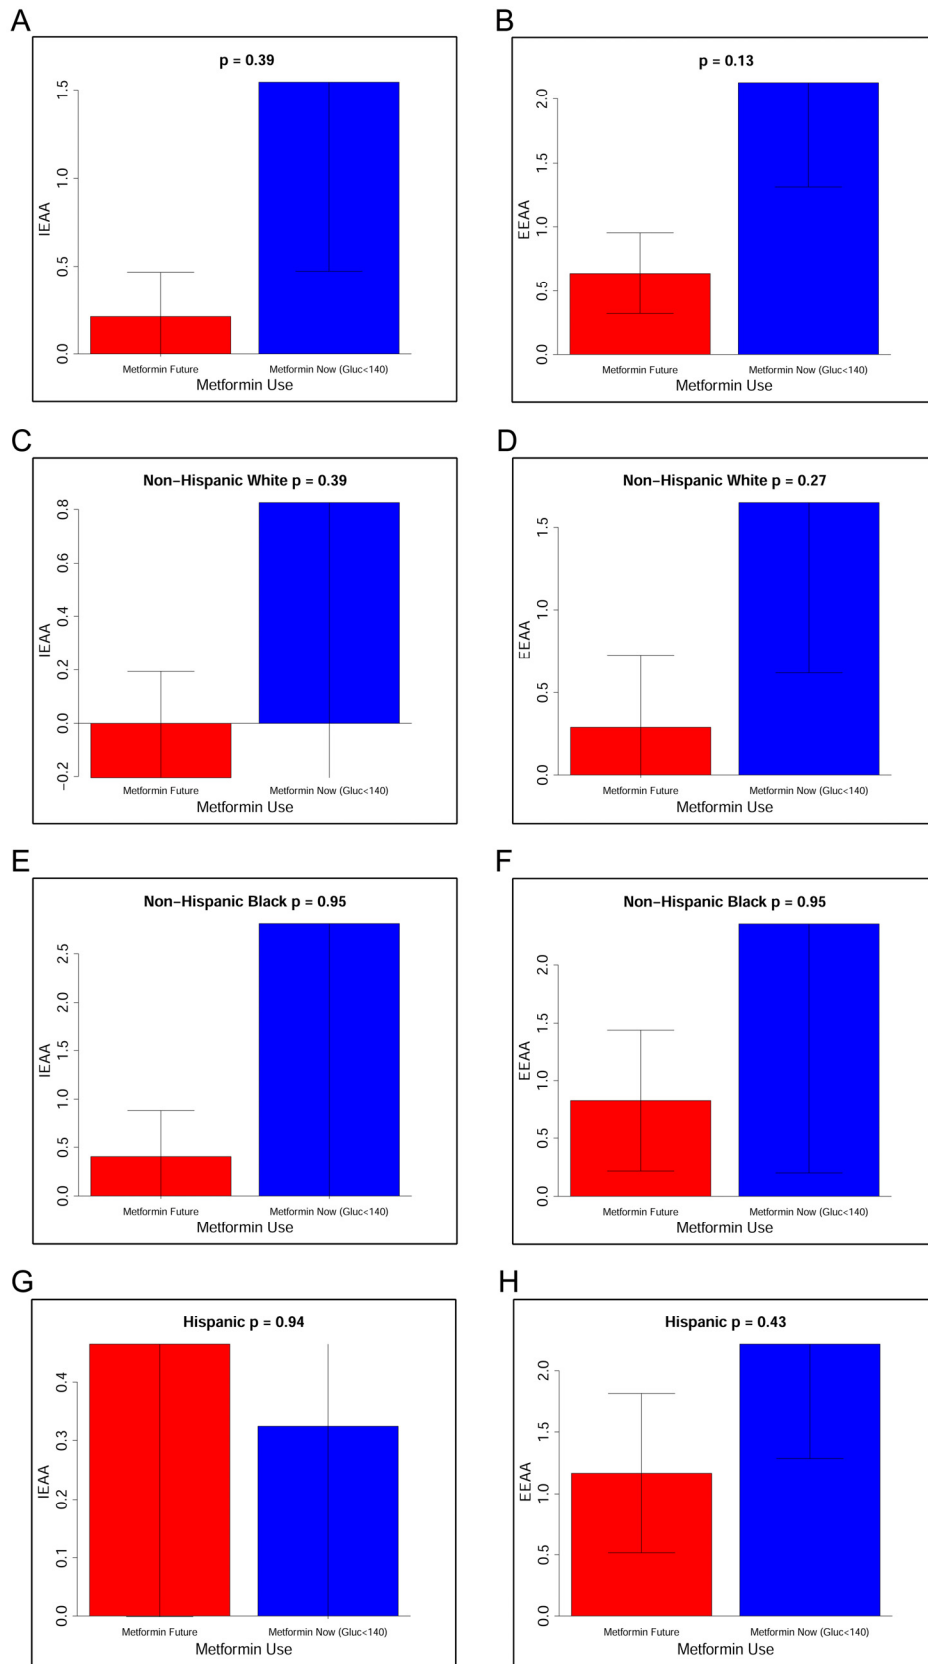

**Supplementary Figure 9. IEAA and EEAA of future and non-hyperglycemic current metformin users in the WHI.** Columns 1 and 2 show the IEAA and EEAA of future metformin users and current metformin users with fasting glucose levels of < 140mg/dL colored in red and blue respectively. Rows correspond to different ethnic strata: all ethnic groups, non-hispanic white, non-hispanic black, and hispanic. P-values for each comparison are shown at the top of each plot.



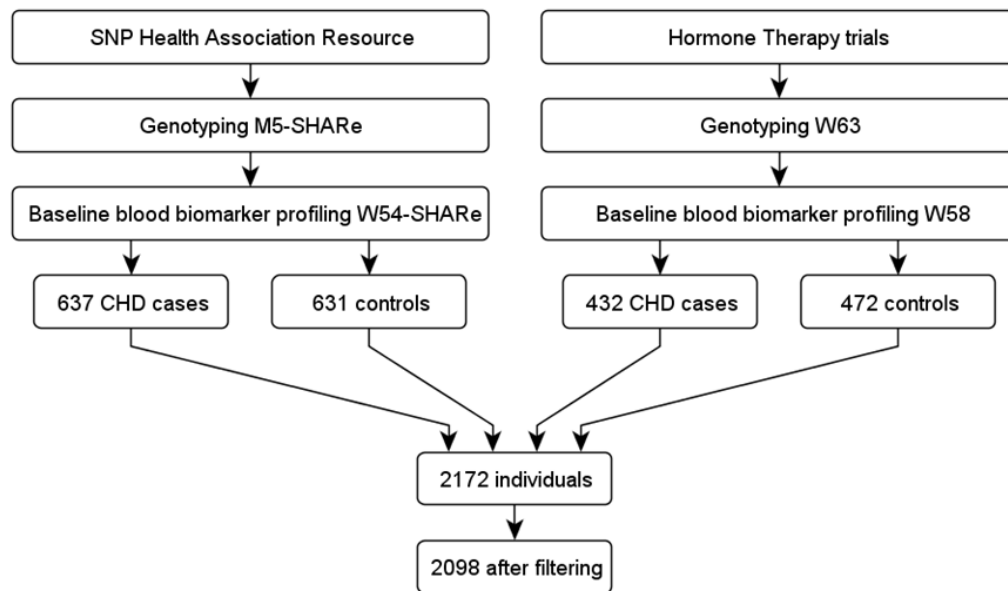

**Supplementary Figure 10. Schematic denoting the selection of the WHI BA23 study sample.** The study participants were originally selected for a case-control GWAS on coronary heart disease (CHD). Participants were selected from either the SNP Health Association Resource or the Hormone Therapy trials, and underwent genotyped and core blood biomarkers profiling. The data from these individuals were agglomerated and filtered for missing data.
